# Supplementary material
Source: PubMed Central journal article supplement (PMC5225301)

Figure S3

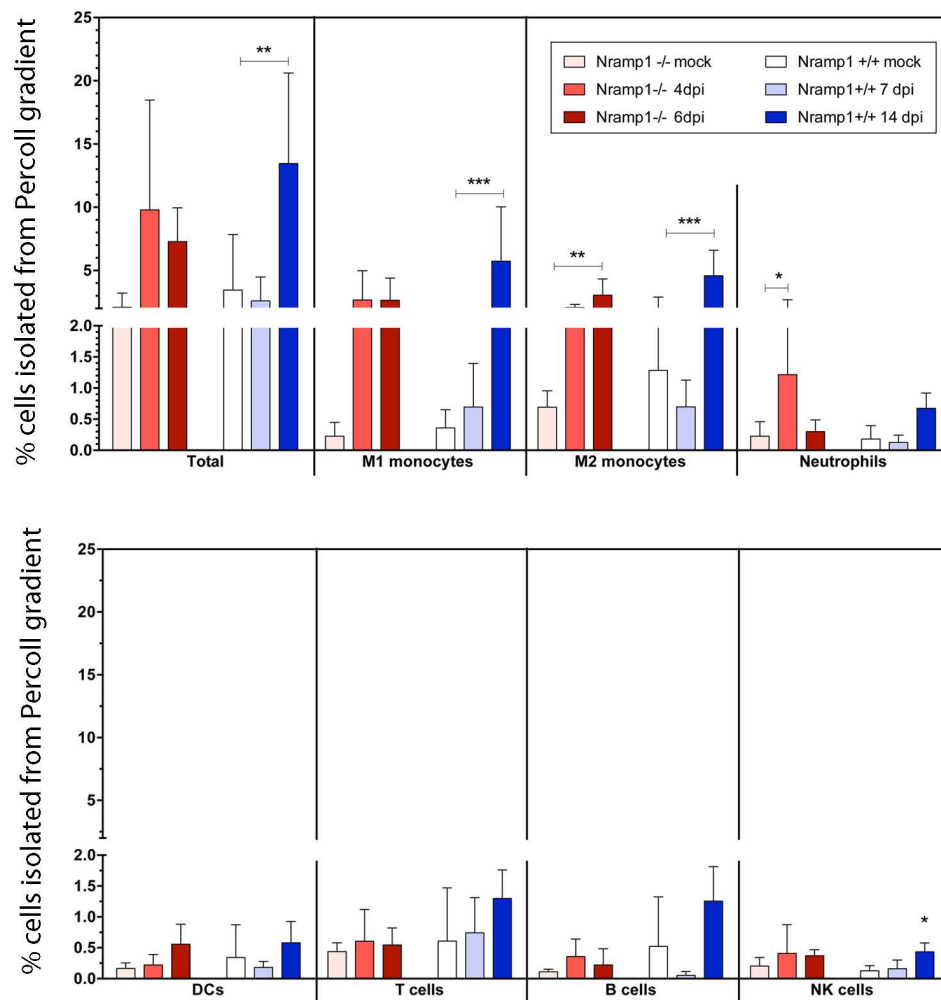

Supplement: mmc3.pdf [file mmc3.pdf]

Figure S4

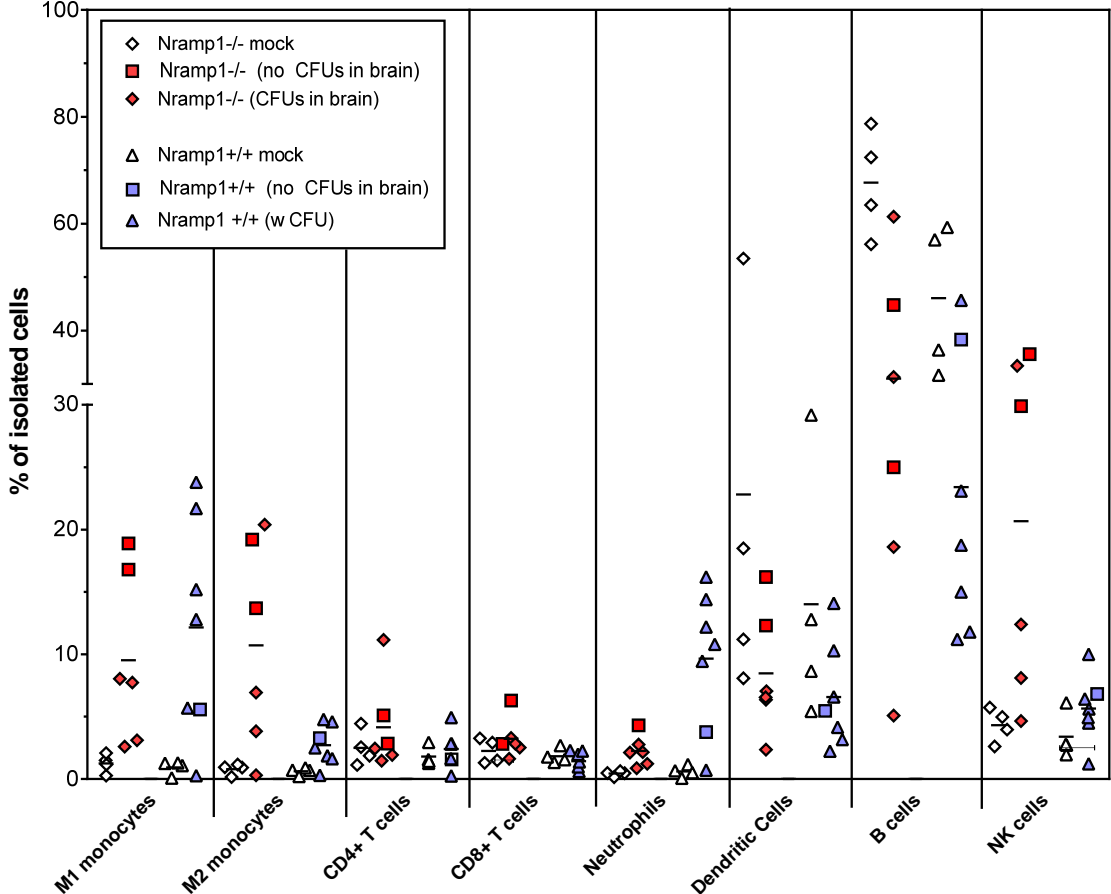

Supplement: mmc4.pdf [file mmc4.pdf]
